# Supplementary material
Source: publisher site journal article supplement (https://www.spandidos-publications.com/1609/downloadSupplementary)

Figure S1. Effect of miR33a inhibitor and the control sequence on the expression levels of miR33a in THP-1 macrophages (n=3 per group). \*P<0.05 vs. the control group. #P<0.05 vs. the foam cell model group. miR, microRNA; ox-LDL, oxidized low-density lipoprotein.

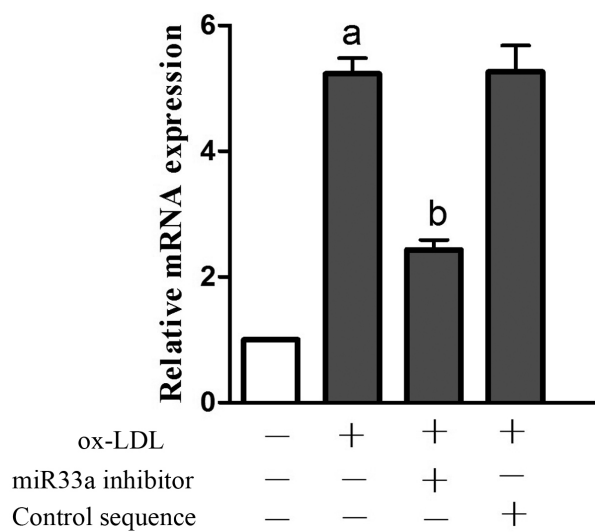

Supplement: Supplementary file 1 [file downloadSupplementary]
